# Supplementary material for: MRI-Based Radiomics to Differentiate between Benign and Malignant Parotid Tumors With External Validation
Source: PubMed Central journal article supplement (PMC8111169; doi:10.3389/fonc.2021.656918), 2021-04-27
Supplement: DataSheet_2.pdf [file DataSheet_2.pdf]

**Supplementary Table 1** List of included Radiomic Features

| <b>Feature Family (count)</b> |                                 |                                    |                                        |                           |
|-------------------------------|---------------------------------|------------------------------------|----------------------------------------|---------------------------|
| <b>Morphological (29)</b>     | <b>IntensityHistogram(23)</b>   | <b>IntensityVolumeHistogram(7)</b> | <b>GrayLevelCooccurrenceMatrix(25)</b> | <b>IntensityDirect(9)</b> |
| Volume                        | Mean                            | VolumeIntFract_10                  | JointMaximum                           | GlobalEntropy             |
| ApproximateVolume             | Variance                        | VolumeIntFract_90                  | JointAverage                           | GlobalMean                |
| SurfaceArea                   | Skewness                        | IntensityVolFract_10               | JointVariance                          | GlobalMedian              |
| SurfaceToVolumeRatio          | Kurtosis                        | IntensityVolFract_90               | JointEntropy                           | InterQuartileRange        |
| Compactness1                  | Median                          | VolumeFractionDiff                 | DifferenceAverage                      | Kurtosis                  |
| Compactness2                  | Min                             | IntensityFractDiff                 | DifferenceVariance                     | Skewness                  |
| SphericalDisproportion        | P10                             | AreaUnderIVHCurve                  | DifferenceEntropy                      | P25                       |
| Sphericity                    | P90                             |                                    | SumAverage                             | P75                       |
| Asphericity                   | Max                             |                                    | SumVariance                            |                           |
| CentreOfMassShift             | Mode                            |                                    | SumEntropy                             |                           |
| Maximum3DDiameter             | InterQuartileRange              |                                    | AngularSecondMoment                    |                           |
| MajorAxisLength               | Range                           |                                    | Contrast                               |                           |
| MinorAxisLength               | MeanAbsoluteDeviation           |                                    | Dissimilarity                          |                           |
| LeastAxisLength               | RobustMeanAbsoluteDeviation     |                                    | InverseDifference                      |                           |
| Elongation                    | MedianAbsoluteDeviation         |                                    | InverseDiffNorm                        |                           |
| Flatness                      | CoefficientOfVariation          |                                    | InverseDiffMoment                      |                           |
| VolumeDensity_AABB            | QuartileCoefficientOfDispersion |                                    | InverseDiffMomentNorm                  |                           |
| AreaDensity_AABB              | Entropy                         |                                    | InverseVariance                        |                           |
| VolumeDensity_OMBB            | Uniformity                      |                                    | Correlation                            |                           |
| AreaDensity_OMBB              | MaximumHistogramGradient        |                                    | AutoCorrelation                        |                           |
| VolumeDensity_AEE             | MaximumHistogramGradientGL      |                                    | ClusterTendency                        |                           |
| AreaDensity_AEE               | MinimumHistogramGradient        |                                    | ClusterShade                           |                           |
| VolumeDensity_MVEE            | MinimumHistogramGradientGL      |                                    | ClusterProminence                      |                           |
| AreaDensity_MVEE              |                                 |                                    | InformationMeasureCor1                 |                           |
| VolumeDensity_CH              |                                 |                                    | InformationMeasureCor2                 |                           |
| AreaDensity_CH                |                                 |                                    |                                        |                           |
| IntegratedIntensity           |                                 |                                    |                                        |                           |
| MoransIIndex                  |                                 |                                    |                                        |                           |
| GearysCMeasure                |                                 |                                    |                                        |                           |

A detailed description of radiomic features included in each family is reported in IBSI reference manual (Zwanenburg A, Leger S, Vallières M, Löck S. Image biomarker standardisation initiative. arXiv preprint arXiv:1612.07003).

**Supplementary Table 2** Pre-processing of Radiomic Features

| <b>T2-weighted Images</b>    |              |                             |                        |                                 |
|------------------------------|--------------|-----------------------------|------------------------|---------------------------------|
| <b>Feature Family</b>        | <b>Count</b> | <b>Interpolation</b>        | <b>Re-segmentation</b> | <b>Intensity Discretization</b> |
| Morphology                   | 29           | -                           | -                      | -                               |
| Intensity Histogram          | 23           | 3D (2x2x2 mm <sup>3</sup> ) | -                      | Fixed Bin Number (32)           |
| Intensity Volume Histogram   | 7            | 3D (2x2x2 mm <sup>3</sup> ) | -                      | Fixed Bin Number (32)           |
| GrayLevelCooccurrenceMatrix* | 25           | 3D (2x2x2 mm <sup>3</sup> ) | -                      | Fixed Bin Number (64)           |

  

| <b>ADC maps</b>       |              |                      |                                                     |                                                          |
|-----------------------|--------------|----------------------|-----------------------------------------------------|----------------------------------------------------------|
| <b>Feature Family</b> | <b>Count</b> | <b>Interpolation</b> | <b>Re-segmentation</b>                              | <b>Intensity Discretization</b>                          |
| Intensity Direct      | 9            | -                    | Range: [0.25-3]×10 <sup>-3</sup> mm <sup>2</sup> /s | Fixed Bin Size (0.1×10 <sup>-3</sup> mm <sup>2</sup> /s) |

\*Aggregation method: 3D average; Directions: [0 1 2 3 4 5 6 7 8 9 10 11 12]. A detailed description of radiomic features included in each family is reported in IBSI reference manual (Zwanenburg A, Leger S, Vallières M, Löck S. Image biomarker standardisation initiative. arXiv preprint arXiv:1612.07003).

**Supplementary Table 3. Values of the most significant features for separation of Warthins' and Malignant Tumors**

|                                                                 | Warthins' Tumors |            | Malignant Tumors |            | <i>P value*</i> |
|-----------------------------------------------------------------|------------------|------------|------------------|------------|-----------------|
|                                                                 | <i>Median</i>    | <i>IQR</i> | <i>Median</i>    | <i>IQR</i> |                 |
| <b>P25 of ADC(<math>\times 10^{-6}</math> mm<sup>2</sup>/s)</b> | 911              | 190        | 1058             | 379        | 0.054           |
| <b>VolumeDensity AEE</b>                                        | 1.29             | 0.07       | 1.26             | 0.10       | 0.011           |
| <b>VolumeDensity CH</b>                                         | 0.82             | 0.09       | 0.78             | 0.12       | 0.025           |

P values refer to Mann-Whitney tes

**Supplementary Table 4. Values of most significant features for differentiating Benign vs Warthins' Tumors**

|                                                                    | Benign Tumors |         | Warthins' Tumor |         | P value* |
|--------------------------------------------------------------------|---------------|---------|-----------------|---------|----------|
|                                                                    | Median        | IQR     | Median          | IQR     |          |
| <b>Median ADC (<math>\times 10^{-6}</math> mm<sup>2</sup>/s)</b>   | 1715,50       | 660,50  | 1069,00         | 324,88  | <0,001   |
| <b>Skewness ADC (<math>\times 10^{-6}</math> mm<sup>2</sup>/s)</b> | -0,03         | 1,04    | 0,48            | 0,74    | 0,021    |
| <b>Mean ADC (<math>\times 10^{-6}</math> mm<sup>2</sup>/s)</b>     | 1702,93       | 641,20  | 1142,26         | 361,11  | <0,001   |
| <b>ADC P25 (<math>\times 10^{-6}</math> mm<sup>2</sup>/s)</b>      | 1506,88       | 612,00  | 911,00          | 189,75  | <0,001   |
| <b>ADC P75 (<math>\times 10^{-6}</math> mm<sup>2</sup>/s)</b>      | 1859,50       | 692,88  | 1409,25         | 434,19  | 0,001    |
| <b>Mean T2</b>                                                     | 15,82         | 5,61    | 14,46           | 5,12    | 0,050    |
| <b>Skewness T2</b>                                                 | -0,16         | 0,91    | 0,78            | 0,94    | 0,040    |
| <b>Median T2</b>                                                   | 16,00         | 7,00    | 14,00           | 6,00    | 0,080    |
| <b>P90 of T2</b>                                                   | 23,50         | 7,00    | 21,00           | 8,00    | 0,085    |
| <b>RobustMeanAbsoluteDeviation</b>                                 | 3,35          | 1,58    | 2,56            | 1,27    | 0,077    |
| <b>MaximumHistogramGradient</b>                                    | 6,50          | 20,25   | 18,00           | 32,13   | 0,065    |
| <b>MinimumHistogramGradient</b>                                    | -7,25         | 15,25   | -16,00          | 18,63   | 0,058    |
| <b>MinimumHistogramGradientGL</b>                                  | 19,00         | 13,00   | 14,00           | 6,75    | 0,069    |
| <b>AreaDensity AABB</b>                                            | 0,62          | 0,02    | 0,66            | 0,08    | 0,019    |
| <b>VolumeDensity AEE</b>                                           | 1,26          | 0,07    | 1,29            | 0,07    | 0,048    |
| <b>VolumeDensity_CH</b>                                            | 0,78          | 0,06    | 0,82            | 0,09    | 0,061    |
| <b>AreaUnderIVHCurve</b>                                           | 0,49          | 0,18    | 0,45            | 0,17    | 0,050    |
| <b>JointAverage</b>                                                | 32,64         | 14,15   | 26,90           | 9,58    | 0,023    |
| <b>DifferenceAverage</b>                                           | 8,89          | 4,33    | 6,81            | 2,01    | 0,047    |
| <b>DifferenceVariance</b>                                          | 64,97         | 47,37   | 40,31           | 23,85   | 0,058    |
| <b>SumAverage</b>                                                  | 64,56         | 26,82   | 53,80           | 19,16   | 0,021    |
| <b>Contrast</b>                                                    | 150,54        | 136,31  | 85,25           | 59,18   | 0,067    |
| <b>Dissimilarity</b>                                               | 8,89          | 4,33    | 6,81            | 2,01    | 0,047    |
| <b>InverseDifference</b>                                           | 0,21          | 0,06    | 0,25            | 0,04    | 0,032    |
| <b>InverseDiffNorm</b>                                             | 0,89          | 0,04    | 0,91            | 0,02    | 0,034    |
| <b>InverseDiffMoment</b>                                           | 0,13          | 0,05    | 0,16            | 0,04    | 0,034    |
| <b>InverseDiffMomentNorm</b>                                       | 0,97          | 0,03    | 0,98            | 0,01    | 0,058    |
| <b>InverseVariance</b>                                             | 0,13          | 0,04    | 0,16            | 0,04    | 0,047    |
| <b>AutoCorrelation</b>                                             | 1089,46       | 884,45  | 795,49          | 465,05  | 0,025    |
| <b>ClusterShade</b>                                                | -838,35       | 4825,44 | 1886,75         | 2160,23 | 0,058    |

\* P values refer to Mann-Whitney test

**Supplementary Table 5. Values of most significant features for differentiating Benign vs Malignant Tumors**

|                                                                  | Benign Tumors |       | Malignant Tumors |      | P value* |
|------------------------------------------------------------------|---------------|-------|------------------|------|----------|
|                                                                  | Median        | IQR   | Median           | IQR  |          |
| <b>median ADC (<math>\times 10^{-6}</math> mm<sup>2</sup>/s)</b> | 1716          | 661   | 1179             | 435  | <0,001   |
| <b>skewness ADC</b>                                              | -0.03         | 1.04  | 0.69             | 1.06 | 0.001    |
| <b>mean ADC (<math>\times 10^{-6}</math> mm<sup>2</sup>/s)</b>   | 1703          | 641   | 1230             | 441  | <0,001   |
| <b>P25 of ADC (<math>\times 10^{-6}</math> mm<sup>2</sup>/s)</b> | 1507          | 612   | 1058             | 379  | <0,001   |
| <b>P75 of ADC (<math>\times 10^{-6}</math> mm<sup>2</sup>/s)</b> | 1860          | 693   | 1358             | 463  | <0,001   |
| <b>Mean T2</b>                                                   | 15.8          | 5.6   | 12.8             | 4.1  | 0.008    |
| <b>Skewness T2</b>                                               | -0.16         | 0.91  | 0.56             | 1.08 | 0.009    |
| <b>Median T2</b>                                                 | 16.00         | 7.00  | 12.00            | 4.00 | 0.008    |
| <b>P10 of T2</b>                                                 | 9.00          | 3.00  | 6.50             | 4.00 | 0.007    |
| <b>P90 of T2</b>                                                 | 23.50         | 7.00  | 20.00            | 9.00 | 0.038    |
| <b>Mode T2</b>                                                   | 16.0          | 10.0  | 10.5             | 5.0  | 0.012    |
| <b>MaximumHistogramGradientGL</b>                                | 12.0          | 8.5   | 8.0              | 6.0  | 0.052    |
| <b>MinimumHistogramGradientGL</b>                                | 19.00         | 13.00 | 13.00            | 5.50 | 0.009    |
| <b>AreaDensity AEE</b>                                           | 1.58          | 0.15  | 1.68             | 0.21 | 0.009    |
| <b>IntensityVolFract 90</b>                                      | 10.00         | 3.00  | 7.50             | 4.00 | 0.007    |
| <b>AreaUnderIVHCurve</b>                                         | 0.49          | 0.18  | 0.40             | 0.13 | 0.008    |
| <b>JointAverage</b>                                              | 32.6          | 14.1  | 25.5             | 9.1  | 0.013    |
| <b>SumAverage</b>                                                | 64.6          | 26.8  | 51.1             | 18.3 | 0.012    |
| <b>AutoCorrelation</b>                                           | 1089          | 884   | 731              | 486  | 0.013    |
| <b>ClusterShade</b>                                              | -838          | 4825  | 1494             | 4187 | 0.024    |

\* P values refer to Mann-Whitney test

## Confusion Matrix

|    |    |
|----|----|
| TP | FP |
| FN | TN |

TP = true positive; FP = false positive; TN = true negative; FN = false negative;

### 1) Warthin's versus Malignant tumors

Training Cohort

|    |    |
|----|----|
| 28 | 2  |
| 4  | 11 |

Validation Cohort

|    |   |
|----|---|
| 18 | 3 |
| 2  | 4 |

### 2) Benign versus Warthin's tumors

Training Cohort

|    |    |
|----|----|
| 11 | 1  |
| 2  | 23 |

Validation Cohort

|   |    |
|---|----|
| 6 | 1  |
| 1 | 16 |

### 3) Benign versus Malignant tumors

Training Cohort

|    |    |
|----|----|
| 27 | 6  |
| 5  | 18 |

Validation Cohort

|    |    |
|----|----|
| 17 | 1  |
| 3  | 16 |

## Supplementary Figures:

### Box-and-whisker plots of the relevant features included in the models

**Figure 1.** Box-and-whisker plots of the two features included in the predictive model for discriminating Warthin's versus malignant tumors: the 25<sup>th</sup> percentile (P25) of ADC and the morphological feature Volume Density AEE (Approximate Enclosing Ellipsoid) from T2-w images. P-values refer to the Mann-Whitney test.

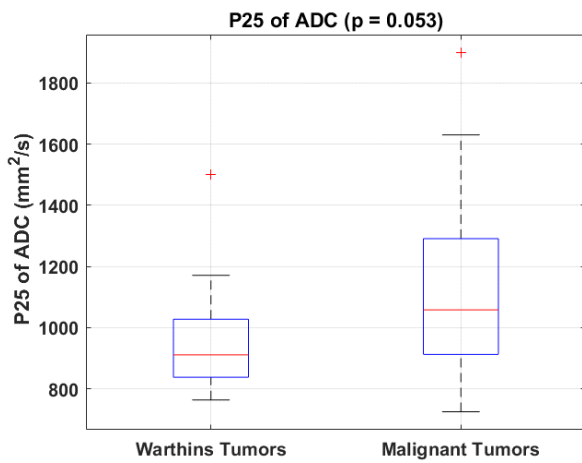

**a**

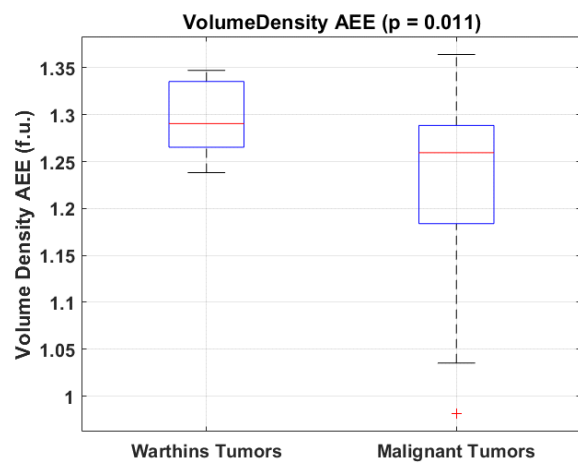

**b**

**Figure 2.** Box-and-whisker plots of the three features included in the predictive model for discriminating benign versus Warthins' tumors: P25 of ADC (a), Volume Density AEE(Approximate Enclosing Ellipsoid) (b) and the Minimum Histogram Gradient (c) from T2-w images. P-values refer to the Mann-Whitney test.

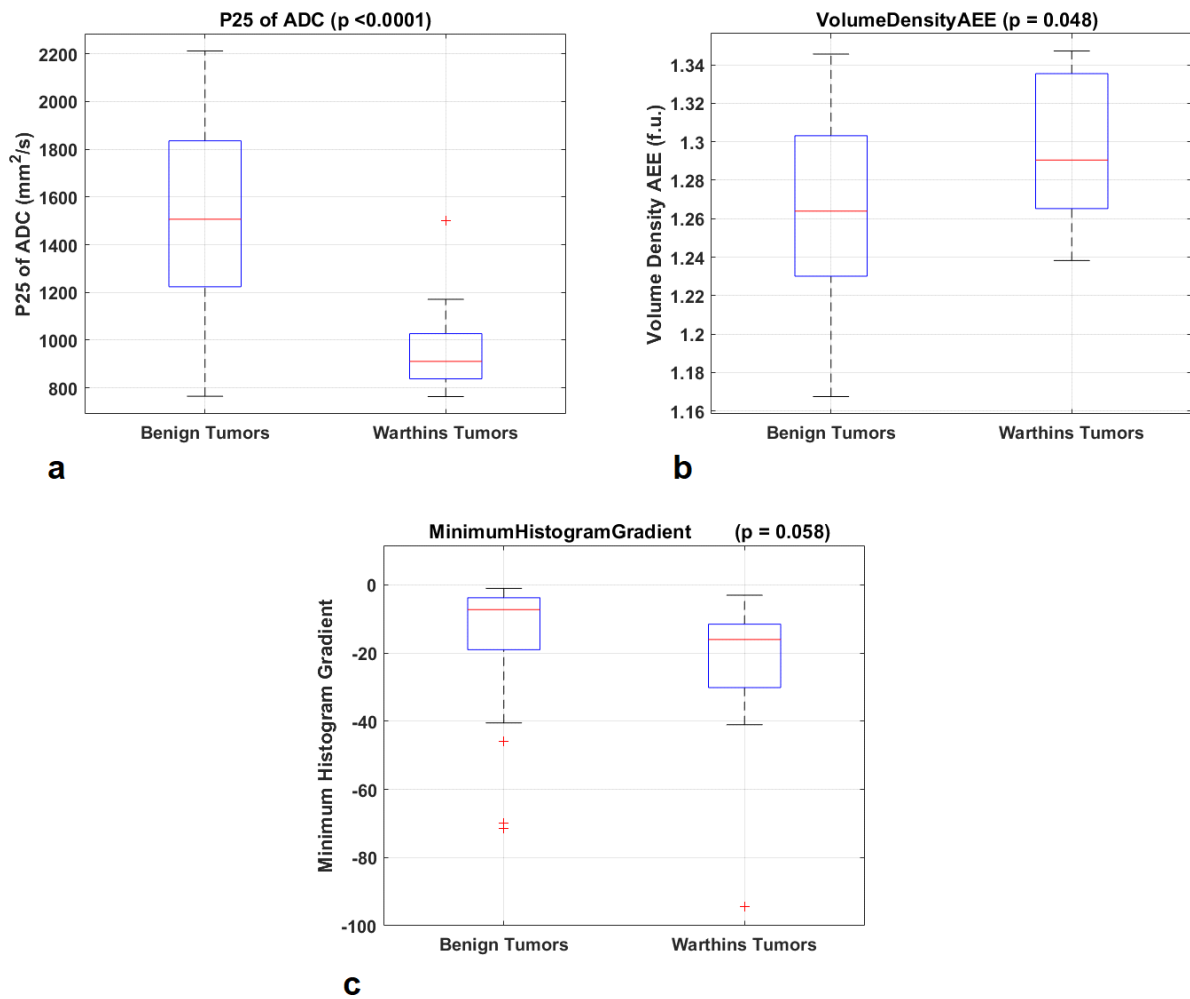



**Figure 3.** Box-and-whisker plots of P25 of ADC and P10 of T2-w signal included in the predictive model for discriminating benign versus malignant tumors. P-value refers to the Mann-Whitney test.

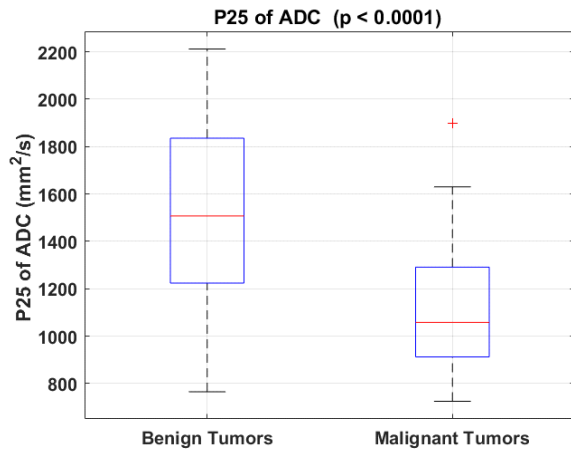

**a**

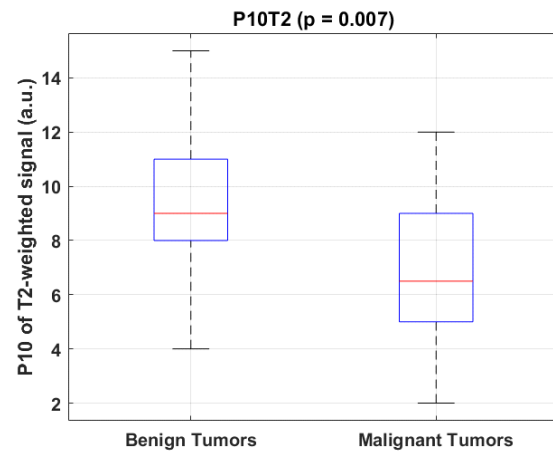

**b**
